# Supplementary material for: NONO enhances mRNA processing of super‐enhancer‐associated GATA2 and HAND2 genes in neuroblastoma
Source: PubMed Central journal article supplement — EMBO Rep. 2022 Nov 23;24(2):e54977. doi: 10.15252/embr.202254977 (PMC9900351; doi:10.15252/embr.202254977), 2022-11-23
Supplement: EMBR-24-e54977-s003.pdf [file EMBR-24-e54977-s003.pdf]

## Appendix information

Zhang *et al.* NONO enhances mRNA processing of super enhancer-associated GATA2 and HAND2 genes in neuroblastoma

| Table of contents  | Page |
|--------------------|------|
| Appendix Table S1  | 2    |
| Appendix Figure S1 | 4    |
| Appendix Figure S2 | 6    |
| Appendix Figure S3 | 8    |

**Appendix Table S1. A list of primers**

| Primer         | Direction | 5' - 3'                      |
|----------------|-----------|------------------------------|
| U6             | Forward   | CTCGCTTCGGCAGCACA            |
|                | Reverse   | AACGCTTCACGAATTTGCGT         |
| RPLP0          | Forward   | AGCCCAGAACAACACTGGTCTC       |
|                | Reverse   | ACTCAGGATTTCAATGGTGCC        |
| $\beta$ -actin | Forward   | GCCAACACAGTGCTGTCTGG         |
|                | Reverse   | TACTCCTGCTTGCTGATCCA         |
| Total NEAT1    | Forward   | GTGGCTGTTGGAGTCGGTAT         |
|                | Reverse   | TAACAAACCACGGTCCATGA         |
| NEAT1_2        | Forward   | GTCTTTCCATCCACTCACGTCTATTT   |
|                | Reverse   | GTA CTCTGTGATGGGGTAGTCAGTCAG |
| MYCN           | Forward   | CGACCACAAGGCCCTCAGTA         |
|                | Reverse   | CAGCCTTGGTGTGGAGGAG          |
| pre_MYCN       | Forward   | CTGCCTGGACAGAAACCTGTTAG      |
|                | Reverse   | TGCACAGCCCTTGAATCTTCTC       |
| DAZAP1         | Forward   | CAGACCGCACACGCTAGATG         |
|                | Reverse   | GTTATCGCTCCTGGGTCCTTTC       |
| pre_DAZAP1     | Forward   | TGGA ACTGGAGAGAGAGGTTTATGG   |
|                | Reverse   | CCTCCCTCTGTGACTTTCCTACAA     |
| HAND2          | Forward   | AAACAGGGCCGCTAACATTTC        |
|                | Reverse   | TAGAGGACGGAAGTGCACAAA        |
| pre_HAND2      | Forward   | AACTGGCTTCGGTAGGGTAGAG       |
|                | Reverse   | GGTCTGAGGGCTAATGGAGGTTA      |
| GATA2          | Forward   | CTGACGACAACCACCACCTTAT       |
|                | Reverse   | CTTCATGGTCAGTGGCCTGTTA       |
| pre_GATA2      | Forward   | AGCGCCAGCATTTCCTCAACTATAC    |
|                | Reverse   | AGGCCTGGTGAGAGCAGATTTA       |
| MALAT1         | Forward   | GAC GGA GGT TGA GAT GAA GC   |
|                | Reverse   | ATT CGG GGC TCT GTA GTC CT   |
| KCNQ2          | Forward   | CCCTCATCGGTGTCTCCTTCTT       |
|                | Reverse   | TTCTCAAAGTGCTTCTGCCTGTG      |
| pre_KCNQ2      | Forward   | TCATCCACTGTTGCTCCTCTGT       |

|         |         |                            |
|---------|---------|----------------------------|
|         | Reverse | CAGGTCTGACGCCCTTCTAACT     |
| RPLP2   | Forward | ATGGATGCAGGAAGTGAGCC       |
|         | Reverse | AAGCCTGAGGAGTGATTGCC       |
| CEP55   | Forward | ATTGCTCAATCACTGTGGTTCT     |
|         | Reverse | TGAGAGTGATTCTTTGGTTGGTATCT |
| GATA2_2 | Forward | CTGCTCCCAGCTCTACTCCAG      |
|         | Reverse | AGGGAAGGTGGAAGTGGAAGAA     |
| GATA2_3 | Forward | GAAGTGTCTCCTGACCCTAGCA     |
|         | Reverse | GGGACTGCCACTTTCCATCTTC     |
| HAND2_2 | Forward | GAGGAAGAAGGAGCTGGTCAGTA    |
|         | Reverse | CGCAGCCAAAGAACACGAGAT      |
| HAND2_3 | Forward | AGACCGACGTGAAAGAGGAGAA     |
|         | Reverse | TTTCTTGTCGTTGCTGCTCACT     |
| GATA2_4 | Forward | AACGTGTCCCGAGCTTAGATTC     |
|         | Reverse | GGTCACTACATCAGCACAATCCT    |
| GATA2_S | Forward | GGCTTACAGGGTAGGAGCTG       |
|         | Reverse | TTCATGTCTGTGCAGGAGTCG      |
| GATA2_M | Forward | GAACAGCAGGAGCCGAGAG        |
|         | Reverse | TCCACTGGGTCAAGCACAG        |
| GATA2_L | Forward | TGGAGTAGAGCTGGGAGCA        |
|         | Reverse | CCCACCAGGCGGACAAA          |

---

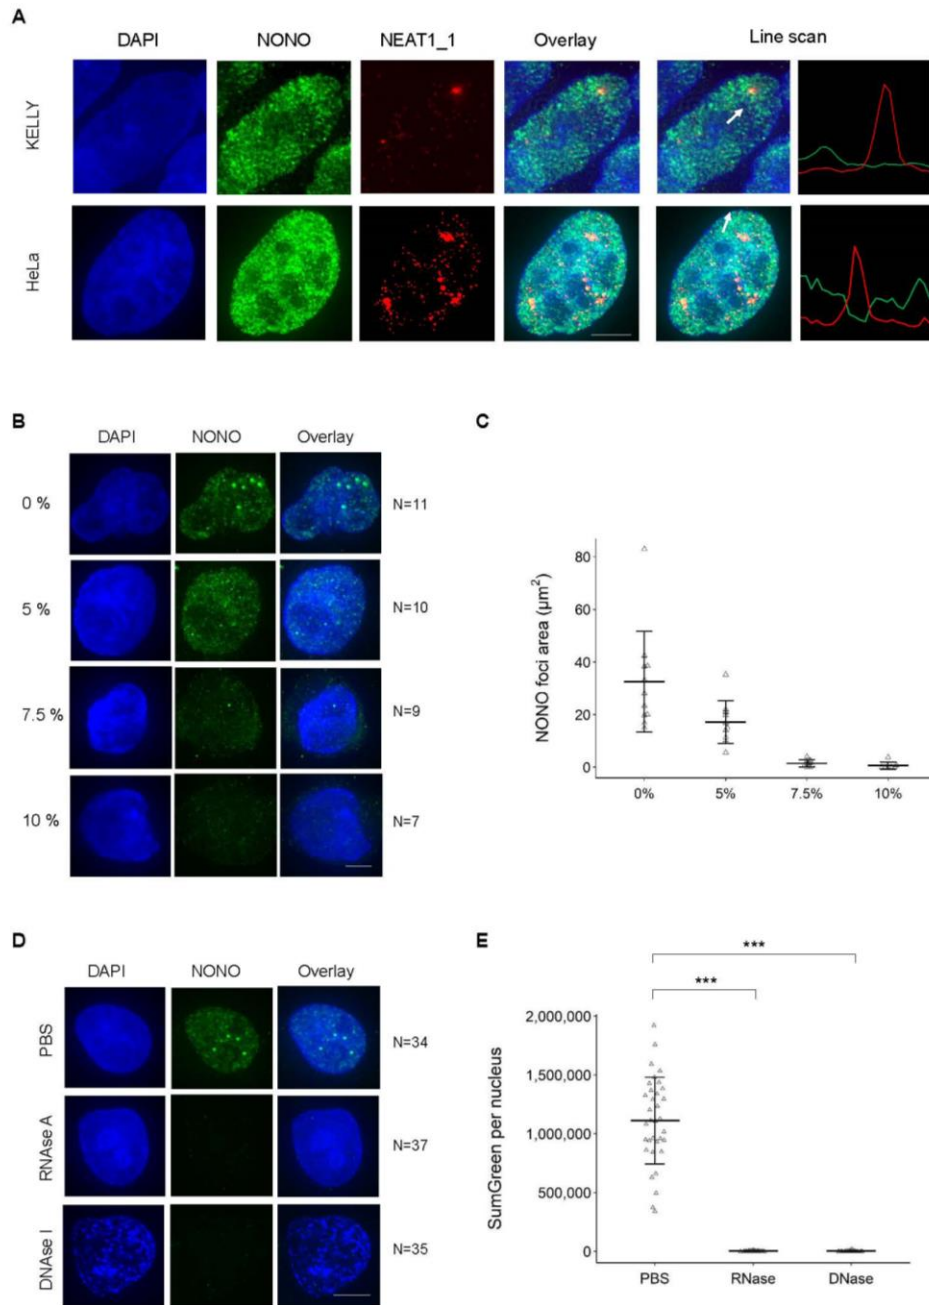

**Appendix Figure S1: NONO distribution is not co-localising with microspeckles, and both RNA and DNA are required for NONO distribution in HeLa cells**

(A) Fluorescence micrograph images of representative cells stained for NONO and NEAT1\_1 in KELLY and HeLa cells showing NONO puncta and microspeckles (as marked by NEAT1\_1). DAPI (blue) stain indicates cell nuclei, NONO immunofluorescence (green) and NEAT1\_1 RNA FISH (red). Scale bar: 5  $\mu\text{m}$ . (B) Fluorescence micrograph images of representative cells treated with 0, 5, 7.5 or 10% 1,6 hexanediol. (C) Dot plot of NONO foci area ( $\mu\text{m}^2$ ) per nucleus at different concentrations of 1,6 hexanediol in (B). Bars are SD. (D)

Fluorescence micrograph images of representative cells treated with PBS, RNase A or DNase I and stained for NONO. (E) Dot plot of SumGreen per nucleus in (D). Bars are SD. \*\*\*P<0.001.

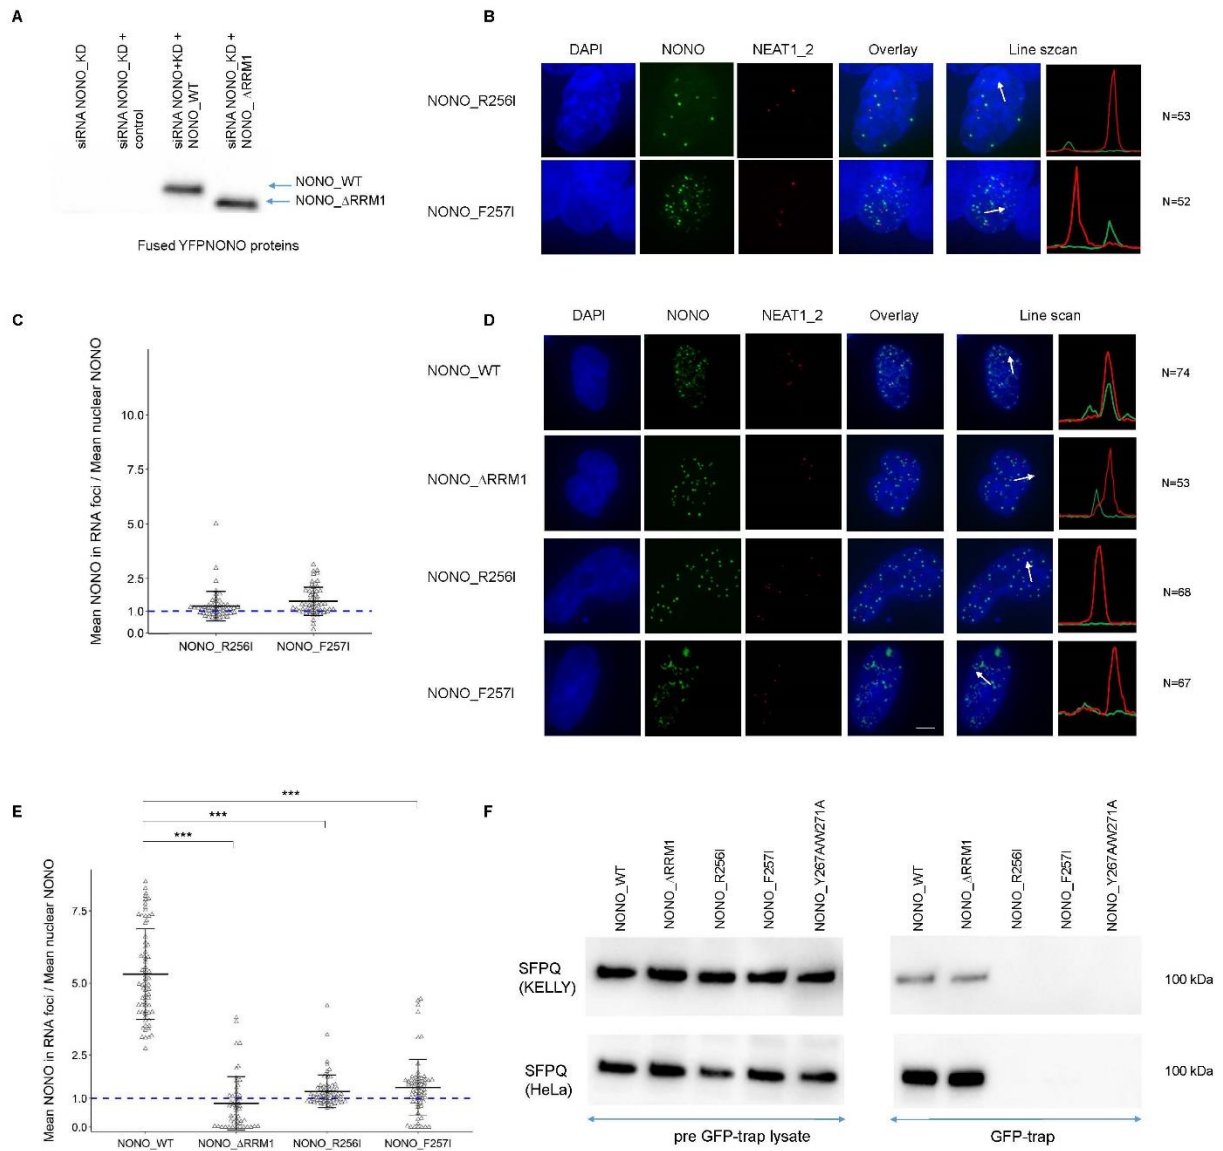

## Appendix Figure S2: Two single mutants of NONO play roles in dimerization

(A) Representative Western blot images of YFP fused NONO\_WT and NONO\_ΔRRM1 proteins in KELLY cells. (B) Fluorescence micrograph images of representative KELLY cells stained for NONO and NEAT1\_2 after transfection with YFP fused NONO\_R256I and NONO\_F257I exogenous protein plasmids. DAPI (blue) stain indicates cell nuclei, YFP fused NONO (green) and NEAT1\_2 RNA FISH (red). Scale bar: 5μm. (C) The enrichment of mean NONO fluorescence detected within RNA FISH foci is quantitatively determined as a ratio relative to mean nuclear NONO fluorescence in (B). Bars are SD. (D) Fluorescence micrograph images of representative HeLa cells stained for NONO and NEAT1\_2 after transfection with YFP fused NONO\_WT, NONO\_ΔRRM1, NONO\_R256I and NONO\_F257I exogenous protein plasmids. DAPI (blue) stain indicates cell nuclei, YFP

fused NONO (green) and NEAT1\_2 RNA FISH (red). Scale bar: 5 $\mu$ m. (E) The enrichment of mean NONO fluorescence detected within RNA FISH foci is quantitatively determined as a ratio relative to mean nuclear NONO fluorescence in (D). Bars are SD. \*\*\*p<0.001. (F) Representative Western blot images of SFPQ protein in pre-GFP-trap lysate samples and GFP-trapped samples transfected with YFP fused NONO\_WT, NONO\_ $\Delta$ RRM1, NONO\_R256I, NONO\_F257I and NONO\_Y267A/W271A exogenous protein plasmids in KELLY and HeLa cells.

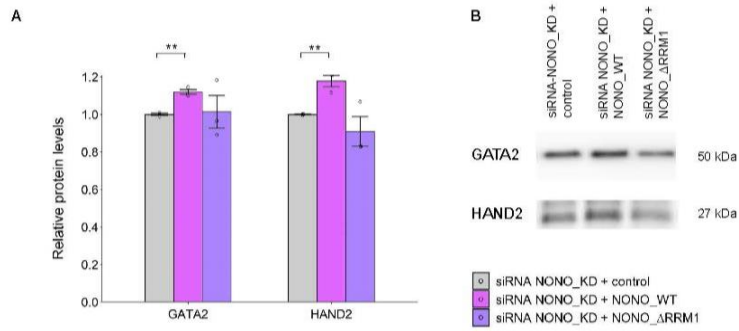

**Appendix Figure S3: Overexpression of NONO\_WT after endogenous NONO knockdown, leads to increased GATA2 and HAND2 protein levels.**

(A) Western blot quantitation analysis of GATA2 and HAND2 protein levels in KELLY cells transfected sequentially with NONO KD siRNA and then siRNA-resistant control (YFP only), YFP fused NONO\_WT or NONO\_ΔRRM1 plasmids. Bars are SEM.  $n \geq 3$ . (B) Representative Western blot images for GATA2 and HAND2 proteins in (A).
